# Supplementary figures and images for: Seasonal influenza vaccination delivery through community pharmacists in England: evaluation of the London pilot
Source: HighWire-hosted journal article supplement (doi:10.1136/bmjopen-2015-009739), 2016-02-01

## Appendix A: Results from patient survey at pharmacies (conducted by NHS)

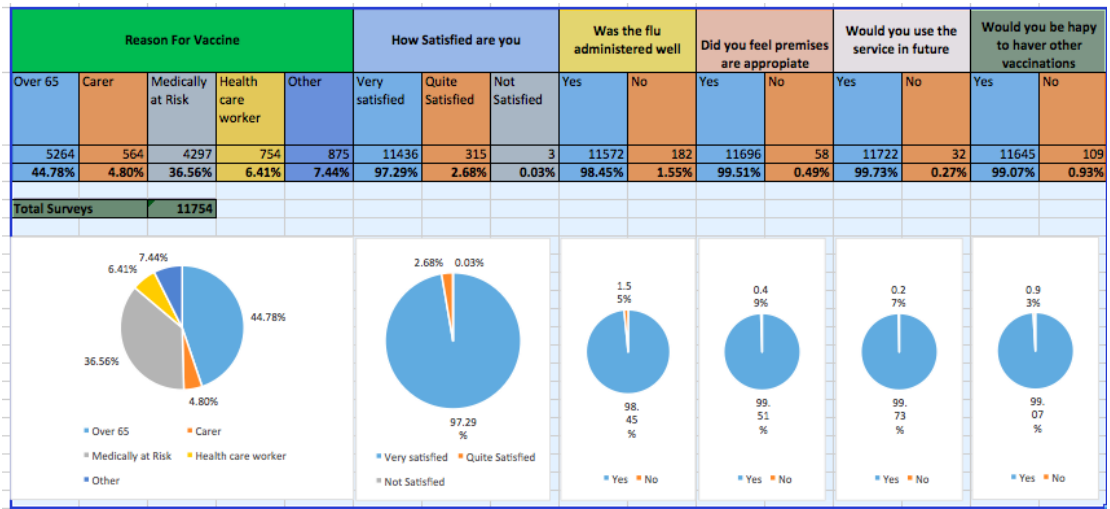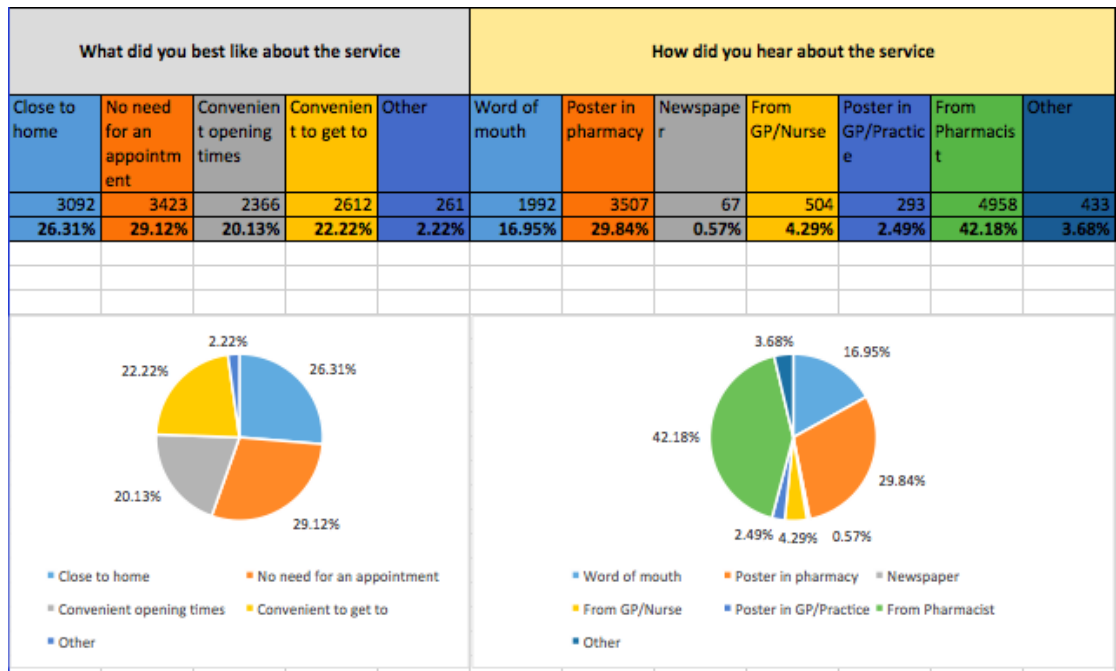

Supplement: bmjopen-2015-009739supp_appendixA.pdf [file bmjopen-2015-009739supp_appendixA.pdf]
